# Supplementary material for: Traditional medicinal plant knowledge and use by local healers in Sekoru District, Jimma Zone, Southwestern Ethiopia
Source: PubMed Central journal article supplement (PMC1905946; doi:10.1186/1746-4269-3-24), 2007-06-04
Supplement: 1746-4269-3-24-S1.pdf [file 1746-4269-3-24-S1.pdf]

Additional file 1. List of medicinal plant species, parts used, methods of preparation, administration and diseases treated

| Species                                                 | Family        | Vernacular name             | Coll. No      | Plant type (Cultivated/wild) | Disease treated                      | Part used    | Condition of plant used (fresh/dried) | Preparation                             | Administration | Provenance  |
|---------------------------------------------------------|---------------|-----------------------------|---------------|------------------------------|--------------------------------------|--------------|---------------------------------------|-----------------------------------------|----------------|-------------|
| <i>Alysicarpus quartianus</i> A. Rich.                  | Fabaceae      | Hadhaa/<br>Korcha<br>Hadhaa | Ha &<br>De 15 | Wild                         | <i>Abiato</i><br>( <i>shererit</i> ) | Root, leaves | Fresh                                 | Crushed, used alone                     | Dermal         | Ganda Chala |
|                                                         |               |                             |               |                              | Amoebiasis                           | Root         | Dried                                 | Powdered, mixed with garlic             | Oral           | Ganda Chala |
|                                                         |               |                             |               |                              | <i>Naqarsaa</i>                      | Leaves       | Fresh                                 | Crushed, Squeezed with water            | Oral           | Ganda Chala |
| <i>Calpurnia aurea</i> (Ait.) Benth.                    | Fabaceae      | Ceekaa                      | Ha &<br>De 39 | Wild                         | Earache<br>( <i>Dhukuba Guraa</i> )  | Leaves       | Fresh                                 | Crushed, squeezed with water            | Auricular      | Liben       |
| <i>Cassia arereh</i> Del.                               | Fabaceae      | Botoroo                     | Ha &<br>De 18 | Wild                         | Snake bite                           | Stem bark    | Fresh                                 | Powdered, mixed with tea                | Oral           | Unquuree    |
| <i>Celtis africana</i> Burm. F.                         | Ulmaceae      | Mataqoma<br>(Muka Morma)    | Ha &<br>De 28 | Wild                         | <i>Gnataa</i> ( <i>Birid</i> )       | Leaves       | Fresh                                 | Squeezed with water                     | Dermal         | Bore        |
| <i>Clausena anisata</i> (Willd.) Hook. f. ex Benth.     | Rutaceae      | Ulmaye                      | Ha &<br>De 37 | Wild                         | <i>Naqarsaa</i>                      | Leaves       | Fresh                                 | Crushed, Squeezed with water            | Oral           | Ganda Chala |
| <i>Clematis hirsuta</i> Perr. & Guill.                  | Ranunculaceae | Fitii                       | Ha &<br>De 99 | Wild                         | Earache<br>( <i>Dhukuba Guraa</i> )  | Leaves       | Fresh                                 | Crushed, squeezed with water            | Auricular      | Ganda Chala |
| <i>Clerodendrum myricoides</i> (Hochst) R. Br. ex Vatke | Verbenaceae   | Marasisa                    | Ha &<br>De 82 | Wild                         | Tumor<br>( <i>Tanachaa</i> )         | Root         | Fresh                                 | Crushed, Squeezed with water            | Oral           | Unquuree    |
| <i>Croton macrostachyus</i> Del.                        | Euphorbiaceae | Makanissaa                  | Ha &<br>De 6  | Wild                         | <i>Abiato</i><br>( <i>shererit</i> ) | Leaves       | Fresh or dried                        | Concoction, Pounded, Powdered, squeezed | Dermal         | Unquuree    |
|                                                         |               |                             |               |                              | <i>Gnataa</i> ( <i>Birid</i> )       | Leaves       | Fresh                                 | Squeezed with water                     | Dermal         | Liben       |
| <i>Dioscorea praehensilis</i> Benth.                    | Dioscoreaceae | Wociinoo                    | Ha &<br>De 31 | Cultivated                   | Tenea versicolor<br>( <i>Sono</i> )  | Leaves       | Fresh                                 | Crushed, used alone                     | Dermal         | Bore        |
| <i>Engleriana woodfordioides</i> (Schweinf.)            | Loranthaceae  | Harmee                      | Ha &<br>De 51 | Wild                         | Earache<br>( <i>Dhukuba Guraa</i> )  | Leaves       | Fresh                                 | Crushed, squeezed with water            | Auricular      | Bore        |
|                                                         |               |                             |               |                              | Scabies ( <i>Ciitto</i> )            | Root         | Fresh                                 | Crushed, mixed with water & vaseline    | Dermal         | Liben       |
| <i>Entada abyssinica</i>                                | Fabaceae      | Haambalaa                   | Ha &          | Wild                         | Gonorrhoea                           | Root         | Fresh                                 | Crushed, squeezed                       | Intrave        | Unquuree    |

|                                                           |               |                         |            |                  |                                              |                   |                |                                           |              |             |
|-----------------------------------------------------------|---------------|-------------------------|------------|------------------|----------------------------------------------|-------------------|----------------|-------------------------------------------|--------------|-------------|
| Steud. ex A. Rich.                                        |               |                         | De 46      |                  | ( <i>Dhukuba Dhiraa</i> )                    |                   |                | with water                                | nous         | e           |
|                                                           |               |                         |            |                  | Heart failure ( <i>Yelib dikam</i> )         | Stem bark, leaves | Dried          | Crushed, powdered, used alone             | Oral         | Unquure e   |
| <i>Gardenia ternifolia</i> Schumach. & Thonn.             | Rubiaceae     | Kambeelloo/ Gambeelloo  | Ha & De 5  | Wild             | Haemorrhoids ( <i>Kormomo or Kintaroti</i> ) | Fruit             | Fresh or dried | Crushed, powdered, concoction, used alone | Dermal       | Liben       |
| <i>Gloriosa superba</i> L.                                | Colchicaceae  | Dawaurahman/ Rahmaldawa | Ha & De 3  | Wild             | Tumor ( <i>Tanachaa</i> )                    | Root              | Dried          | Powdered, administered with tea or coffee | Oral         | Ganda Chala |
|                                                           |               |                         |            |                  | Tumor ( <i>Tanachaa</i> )                    | Root              | Fresh          | Crushed, mixed with water                 | Oral         | Unquure e   |
|                                                           |               |                         |            |                  | Menstrual pbm ( <i>yalementat</i> )          | Root              | Fresh          | Crushed, mixed with sugar                 | Oral         | Bore        |
| <i>Hypoestes triflora</i> (Forssk.) Roem & Schult         | Acanthaceae   | Togoo                   | Ha & De 9  | Wild/ cultivated | Anaemia ( <i>Hireenaa Daga</i> )             | Leaves            | Fresh          | Decoction, mixed with sugar               | Oral         | Unquure e   |
| <i>Justicia schimperiana</i> (Hochst. Ex nees) T. Anders. | Acanthaceae   | Dhumugaa                | Ha & De 26 | Wild             | Gnataa (Birid)                               | Leaves            | Fresh          | Squeezed with water                       | Dermal       | Liben       |
| <i>Maesa lanceolata</i> Forssk.                           | Myrsinaceae   | Eija Abbayi             | Ha & De 43 | Wild             | Scabies ( <i>Ciitto</i> )                    | Seeds             | Dried          | Powdered, mixed with edible oil           | Dermal       | Ganda Chala |
| <i>Momordica foetida</i> Schumach.                        | Cucurbitaceae | Hidda Boffaa/Buqee      | Ha & De 48 | Wild             | Gonorrhoea ( <i>Dhukuba Dhiraa</i> )         | Root              | Fresh          | Crushed, squeezed with water              | Intravenous  | Unquure e   |
|                                                           |               |                         |            |                  | Abdominal distension ( <i>Gara Kassa</i> )   | Leaves            | Fresh          | Crushed, squeezed, mixed with water       | Oral         | Liben       |
| <i>Myrica salicifolia</i> Hochst. ex A. Rich.             | Myricaceae    | Nolee                   | Ha & De 59 | Wild             | Earache ( <i>Dhukuba Guraa</i> )             | Leaves            | Fresh          | Crushed, squeezed with water              | Auricular    | Unquure e   |
|                                                           |               |                         |            |                  | <i>Naqarsaa</i>                              | Leaves            | Fresh          | Crushed, squeezed with water              | Oral         | Unquure e   |
| <i>Myrsine africana</i> L.                                | Myrsinaceae   | Qachamaa                | Ha & De 6  | Wild             | <i>Naqarsaa</i>                              | Leaves            | Fresh          | Crushed, Squeezed with water              | Oral         | Unquure e   |
| <i>Ocimum lamiifolium</i> Hochst. ex Benth.               | Lamiaceae     | Damakessie              | Ha & De 8  | Wild             | Febrile Illness ( <i>Michii</i> )            | Leaves            | Fresh          | Pounded, squeezed, used alone             | Oral, Dermal | Ganda Chala |
| <i>Oreosyce africana</i> Hook. f.                         | Cucurbitaceae | Hiddii                  | Ha & De 45 | Wild             | Gonorrhoea ( <i>Dhukuba Dhiraa</i> )         | Root              | Fresh          | Crushed, squeezed with water              | Intravenous  | Bore        |
| <i>Plectranthus rupestris</i>                             | Lamiaceae     | Balajuu                 | Ha &       | Wild             | Earache                                      | Leaves            | Fresh          | Crushed, squeezed                         | Auricular    | Bore        |

|                                                 |                |                      |            |                     |                           |        |                |                                         |                             |       |
|-------------------------------------------------|----------------|----------------------|------------|---------------------|---------------------------|--------|----------------|-----------------------------------------|-----------------------------|-------|
| Vatke ex Baker                                  |                |                      | De 47      |                     | ( <i>Dhukuba Guraa</i> )  |        |                | with water                              | ar                          |       |
| <i>Plumbago zeylanica</i> L.                    | Plumbaginaceae | Umeeraa              | Ha & De 11 | Wild/<br>cultivated | Tumor ( <i>Tanachaa</i> ) | Root   | Dried          | Powdered, mixed with water and sugar    | Oral                        | Bore  |
|                                                 |                |                      |            |                     | Tumor ( <i>Tanachaa</i> ) | Twig   | Fresh or dried | Used alone                              | Put on the neck as necklace | Bore  |
| <i>Premna schimperi</i> Engl.                   | Verbenaceae    | Urgessa              | Ha & De 4  | Wild                | <i>Abiato (sheririt)</i>  | Leaves | Fresh or dried | Concoction, Pounded, Powdered, squeezed | Dermal                      | Liben |
|                                                 |                |                      |            |                     | <i>Naqarsaa</i>           | Leaves | Fresh          | Crushed, mixed with water               | Oral                        | Liben |
| <i>Tapinanthus globiferus</i> (A. Rich.) Tiegh. | Loranthaceae   | Dheertu Makanissaa   | Ha & De 98 | Wild                | Tumor ( <i>Tanachaa</i> ) | Leaves | Fresh          | Crushed, mixed with water               | Oral                        | Liben |
| <i>Vernonia amygdalina</i> Del.                 | Asteraceae     | Ebichaa              | Ha & De 30 | Wild                | <i>Abiato (sheririt)</i>  | Leaves | Fresh or dried | Concoction, Pounded, Powdered, squeezed | Dermal                      | Bore  |
| <i>Withania somnifera</i> (L.) Dun              | Solanaceae     | Qorcha Buda (gizawa) | Ha & De 41 | Wild/<br>cultivated | Evil eye ( <i>Buda</i> )  | Leaves | Fresh          | Squeezed, used alone                    | Oral                        | Liben |
